# Supplementary material for: Unmasking the ancestral activity of integron integrases reveals a smooth evolutionary transition during functional innovation
Source: PubMed Central journal article supplement (PMC4792948; doi:10.1038/ncomms10937), 2016-03-10
Supplement: ncomms10937-s1.pdf [file ncomms10937-s1.pdf]

## Influence of Host machinery

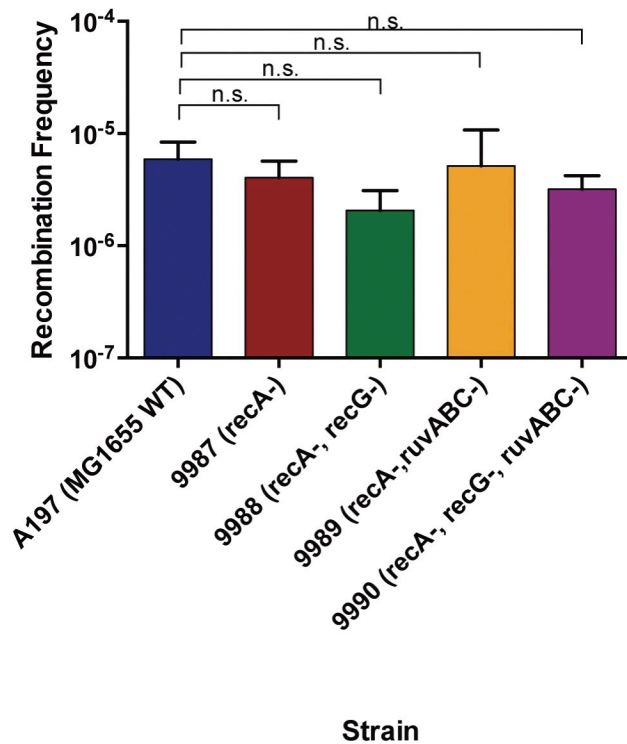

**Supplementary Figure 1.** Influence of host machinery involved in HJ resolution, in the *attI* x *attI* reaction. Bar graph representing the recombination frequency of an MG1655 parental strain and *recA*<sup>-</sup>, *recG*<sup>-</sup>, *ruvABC*<sup>-</sup> and the triple mutant derivatives thereof. Columns represent the mean and error bars represent standard deviation (n=3). Significance testing was performed with Kolmogorov-Smirnov test (P value < 0.05; n.s. not significant.)

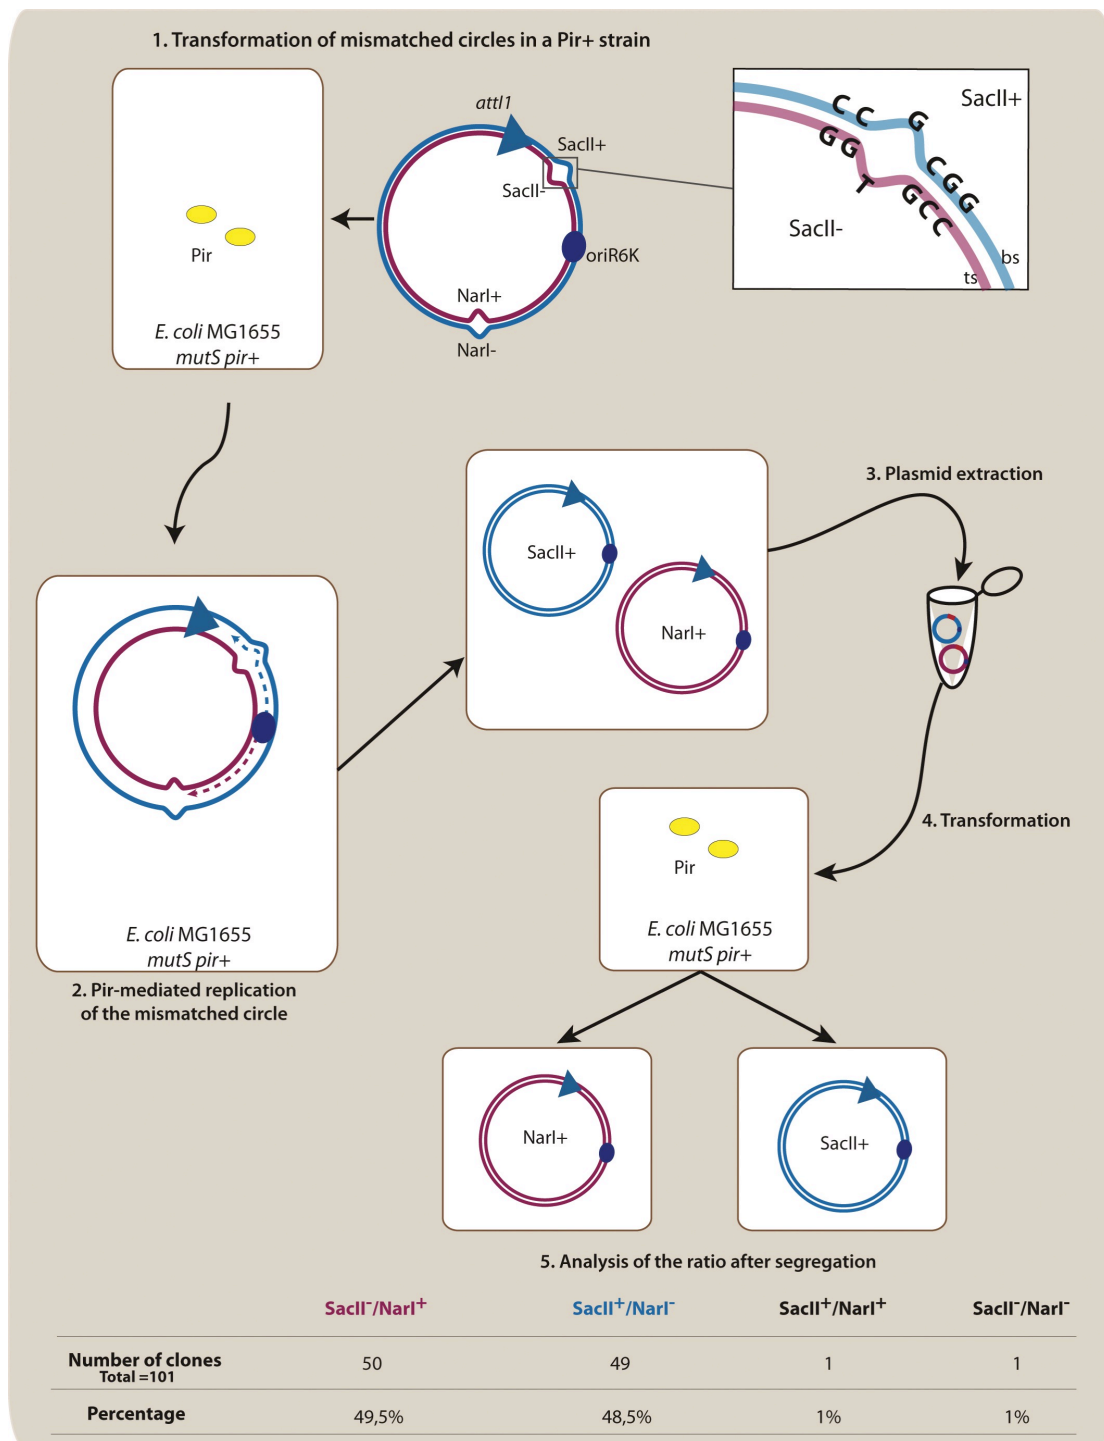

**Supplementary Figure 2.** Verification of mismatched covalent circles. **1**, After production and hybridization of the two strands (see “materials and methods”), the mismatched covalent circles were transformed into an MG1655 *mutS*<sup>-</sup>, *pir*<sup>+</sup> strain. In this genetic background circles are theoretically not repaired (*mutS*<sup>-</sup>) and can be replicated (*pir*<sup>+</sup>). **2**, Each strand is hence used as a template for replication, leading to a mixed population of plasmids within the cell. If the construction of the circles is correct and the 1:1 stoichiometry between strands is respected, each profile should represent 50% of the plasmid content within the cell. **3**, To analyze this, plasmids were extracted, diluted and segregated again by transformation in the same strain (**4**). **5**, Transformants were analyzed by PCR amplification and restriction, giving a close to 50/50 distribution of profiles.

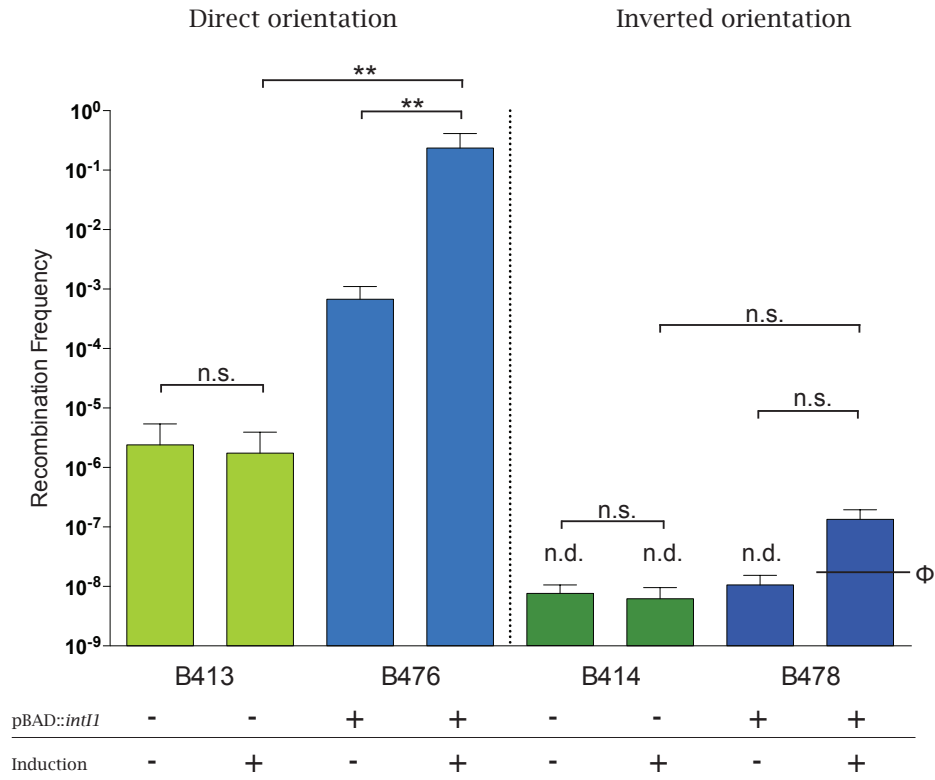

**Supplementary Figure 3.** Recombination frequency of *aadA7* x *ereA2 attC* sites in direct and inverted orientation. Columns represent the mean and error bars represent standard deviation ( $n \geq 3$ ). Significance testing was performed with an ANOVA test (\*\*: P value < 0.01; n.s.: not significant; n.d.: not detected). In the reactions where no recombinants were detected the column represents the limit of detection of the experiment.  $\Phi$  represents the limit of detection ( $1,67 \times 10^{-8}$ ) for recombination events in which the *attC* could have hypothetically been recognized and processed as a double strand (not detected).

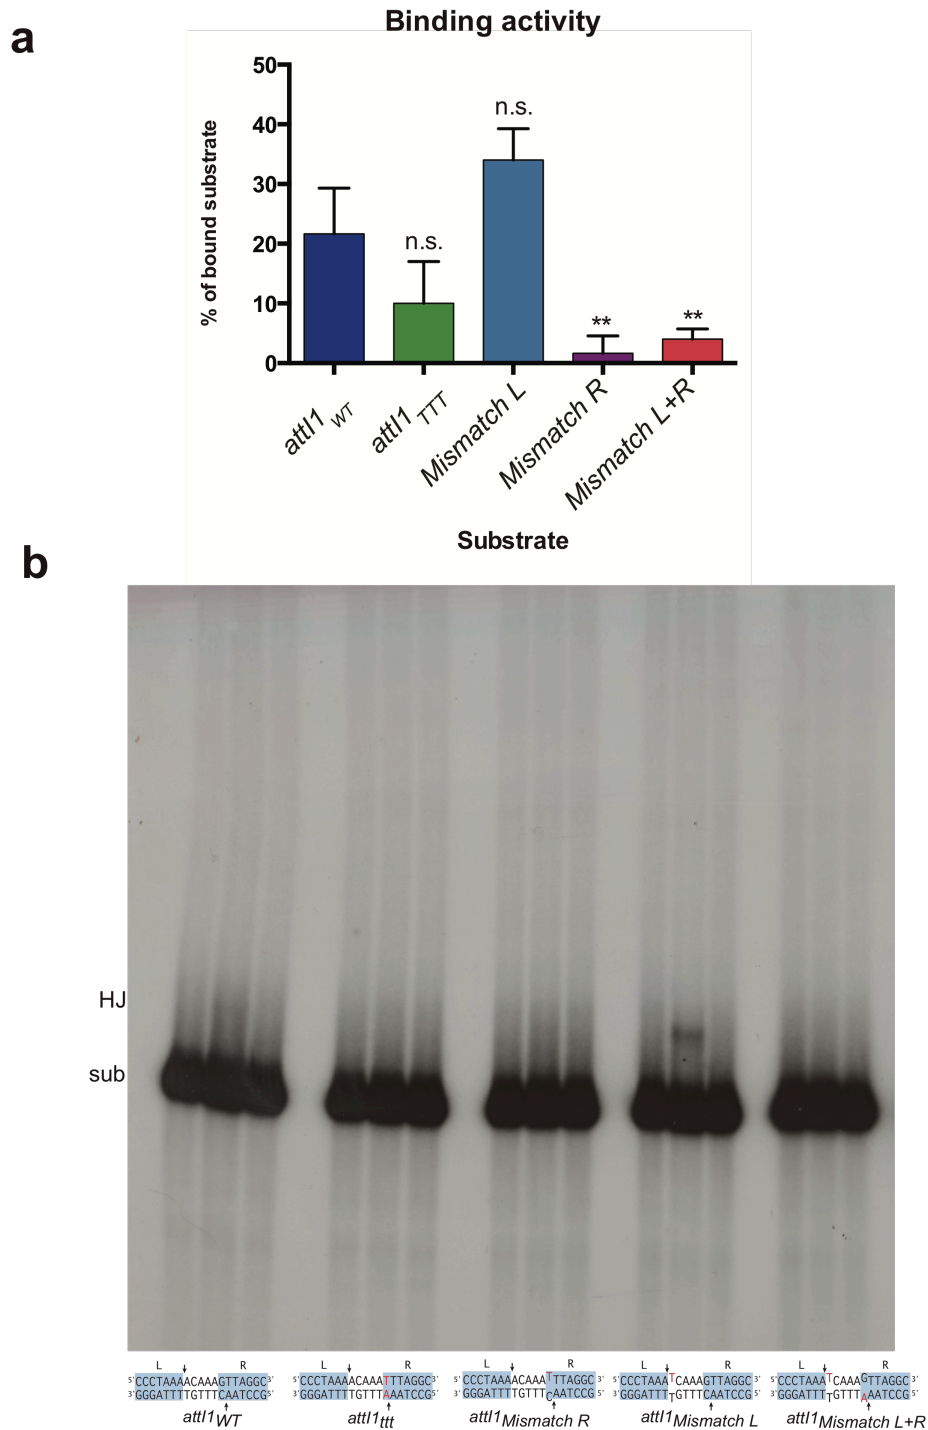

**Supplementary Figure 4.** Activity of IntI1 on mismatched sites **(a)** Binding activity of IntI1 to wt *attI1* site and mismatched sites. Binding is measured as the percentage of substrate retained on nitrocellulose filters after incubating 5 pmoles of integrase with 1 pmol of radiolabeled substrate. Values represent the mean and error bars the standard deviation (n=3). Statistical analysis was performed using Dunnett's test with the binding to the wt site as the control (n.s.: not significant; \*\*: significant ( $\alpha=0,01$ )). **(b)** Uncut gel from Figure 5. Sub: substrate.

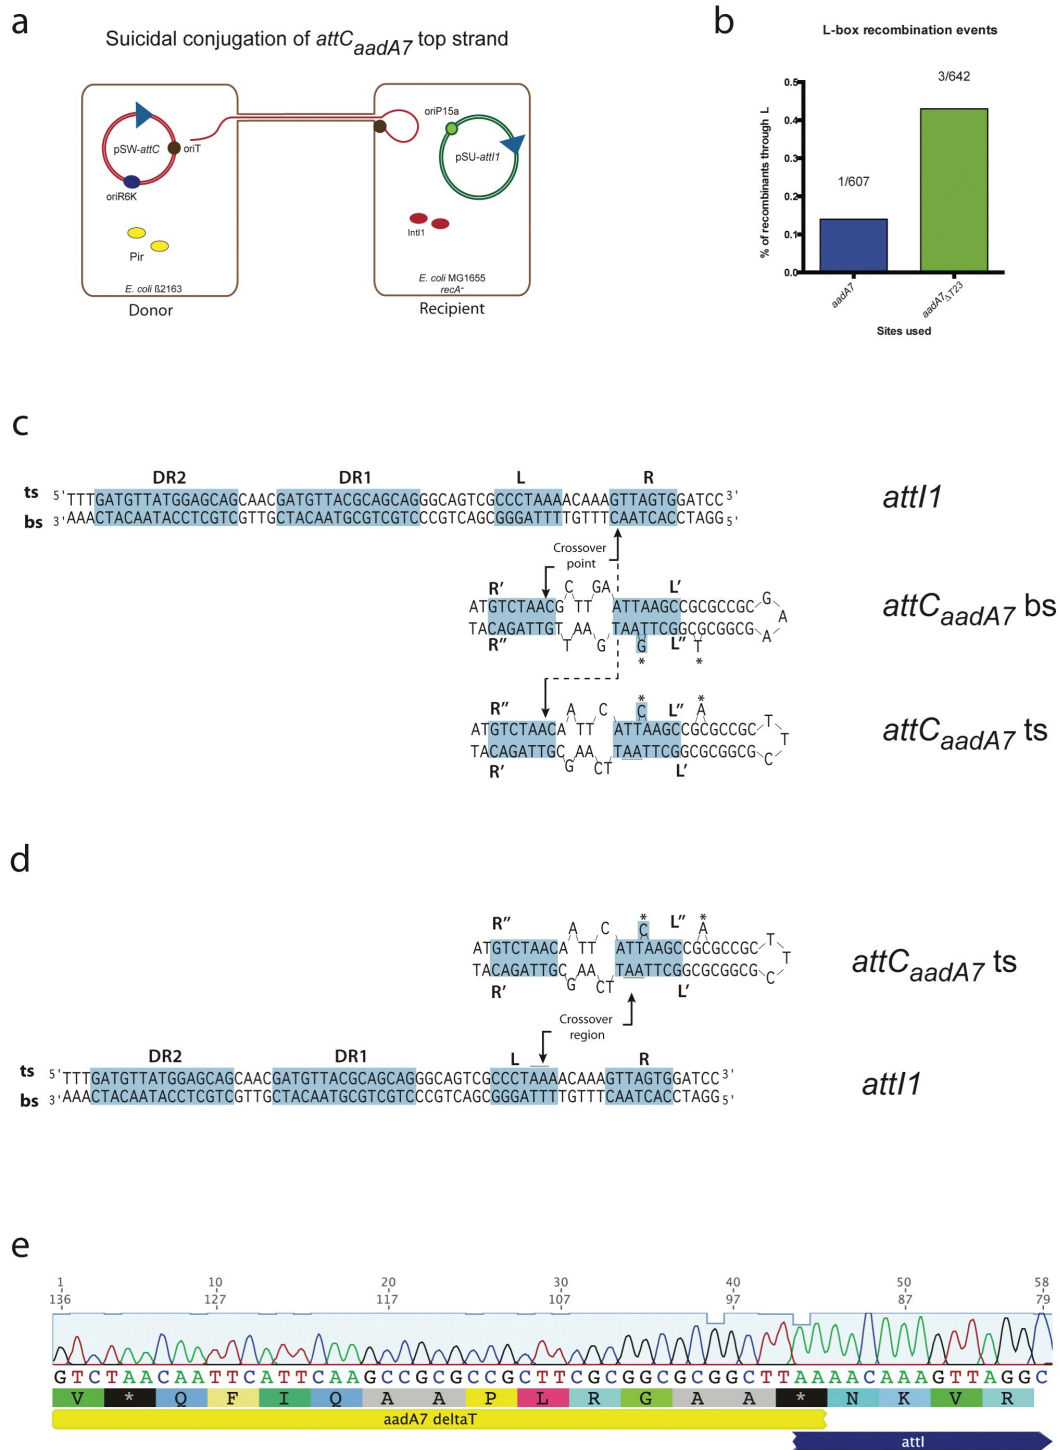

**Supplementary Figure 5.** L-box recombination in the *attI* x *attC* reaction. **(a)** Diagram of the suicidal conjugative delivery of the top strand of *attC<sub>aadA7</sub>* and a  $\Delta T_{23}$  variant. **(b)** Frequency of L-box recombination events (described in **d**) for wild type and  $\Delta T_{23}$  mutant site. **(c)** Diagram of the known recombination events involving the R box of *attC<sub>aadA7</sub>* (bs and ts) and of *attI*. **(d)** Recombination events through the L-boxes detected in this experiment. The crossover region is marked based on **e**. **(e)** Example of the sequence of the *attI* x *attC<sub>aadA7</sub> $\Delta T_{23}$*  recombination product after left-box recombination. The exact crossover point cannot be determined due to adenine repetitions.

Supplementary Table 1. *Escherichia coli* strains used in this work

| Strain number                         | Relevant genotype                                                                                                                                                                     | Reference                               |
|---------------------------------------|---------------------------------------------------------------------------------------------------------------------------------------------------------------------------------------|-----------------------------------------|
| <b>Basic Strains</b>                  |                                                                                                                                                                                       |                                         |
| ω55                                   | <i>E. coli</i> K12 MG1655                                                                                                                                                             | Laboratory collection                   |
| ω162                                  | DH5α                                                                                                                                                                                  | Laboratory collection                   |
| ω1628                                 | Π1 DH5α <i>ΔthyA::(erm-pir)</i>                                                                                                                                                       | Demarre <i>et al.</i> 2005 <sup>1</sup> |
| ω72                                   | β2163                                                                                                                                                                                 | Demarre <i>et al.</i> 2005 <sup>1</sup> |
| ω87                                   | β2150 <i>ΔdapA::(erm,pir ) thrB1004, pro, thi, strA, hsdS, lacZ DM15,(F' lacZ DM15 lacIq, traD36, proA+, proB+)</i>                                                                   | Demarre <i>et al.</i> 2005 <sup>1</sup> |
| ω8488                                 | MG1655 <i>ΔdapA recA269::Tn10</i> (p3153) strain used for the integration of pSW plasmids into the attB site of the chromosome through lambda recombination mediated by plasmid p3153 | This work                               |
| <b>Host Machinery</b>                 |                                                                                                                                                                                       |                                         |
| ωA197                                 | MG1655 (p3938) (p4884)                                                                                                                                                                | This work                               |
| ω9987                                 | MG1655 <i>recA269::Tn10</i> (N4279) with plasmids p3938 and p4884                                                                                                                     | RG. Lloyd and this work.                |
| ω9988                                 | MG1655 <i>recA269::Tn10 recG263::kan</i> (N5059) (p3938) (p4884)                                                                                                                      | RG. Lloyd and this work.                |
| ω9989                                 | MG1655 <i>recA269::Tn10 ruvABC::cm</i> (N5091) (p3938) (p4884)                                                                                                                        | RG. Lloyd and this work.                |
| ω9990                                 | MG1655 <i>recA269::Tn10 ruvABC::cm recG263::Km</i> (N5070) (p3938) (p4884)                                                                                                            | RG. Lloyd and this work.                |
| <b>Mismatched Covalent Circles</b>    |                                                                                                                                                                                       |                                         |
|                                       | <b>Single strand production</b>                                                                                                                                                       |                                         |
| ω8675                                 | β2150 (p8669)                                                                                                                                                                         | This work                               |
| ω8676                                 | β2150 (p8670)                                                                                                                                                                         | This work                               |
|                                       | <b>Transformed strains</b>                                                                                                                                                            |                                         |
| ω7120                                 | MG1655 <i>mutS215</i> (p1177)                                                                                                                                                         | Loot <i>et al.</i> 2012 <sup>2</sup>    |
| ω7994                                 | MG1655 <i>mutS215</i> (p3938) (p929)                                                                                                                                                  | Loot <i>et al.</i> 2012 <sup>2</sup>    |
| ωA266                                 | MG1655 <i>mutS215</i> (p929)                                                                                                                                                          | Loot <i>et al.</i> 2012 <sup>2</sup>    |
| ω1628                                 | Π1 DH5α <i>ΔthyA::(erm-pir)</i>                                                                                                                                                       | Demarre <i>et al.</i> 2005 <sup>1</sup> |
| <b>Chromosome recombination assay</b> |                                                                                                                                                                                       |                                         |
| ωA642                                 | DH5α (pA642) plasmid from GeneArt with <i>attI</i> sites in direct (head to tail) orientation.                                                                                        | This work                               |
| ωA749                                 | DH5α (pA749) inversion of the left <i>attI</i> site in pA642 ( <i>attI</i> sites in tail to tail orientation)                                                                         | This work                               |
| ωA873                                 | Π1 (pA873) cloning of <i>attI1<sub>WT</sub>-attI1<sub>STOP</sub>-dapA</i> in direct orientation (from pA642) in a pSW plasmid                                                         | This work                               |
| ωA874                                 | Π1 (pA874) cloning of <i>attI1<sub>WT</sub>-attI1<sub>STOP</sub>-dapA</i> in inverse orientation (from pA749) in a pSW plasmid                                                        | This work                               |
| ωB36                                  | ω8488 attB:: <i>attI1<sub>WT</sub>-attI1<sub>STOP</sub>-dapA</i> [Sp <sup>R</sup> ] (integration of plasmid pA873 in the chromosome). Direct orientation of the sites.                | This work                               |
| ωB37                                  | ω8488 attB:: <i>attI1<sub>WT</sub>-attI1<sub>STOP</sub>-dapA</i> [Sp <sup>R</sup> ] (integration of plasmid                                                                           | This work                               |

|                                                             |                                                                                                                                                                                       |                                         |
|-------------------------------------------------------------|---------------------------------------------------------------------------------------------------------------------------------------------------------------------------------------|-----------------------------------------|
|                                                             | pA874 in the chromosome). Inverse orientation of the sites.                                                                                                                           |                                         |
| ωB82                                                        | B36 (p3938)                                                                                                                                                                           | This work                               |
| ωB83                                                        | B37 (p3938)                                                                                                                                                                           | This work                               |
| ωC131                                                       | Π1 (pC131) plasmid in which the <i>attI</i> <sub>WT</sub> of pA874 has been changed for an <i>attI</i> <sub>AAA</sub>                                                                 | This work                               |
| ωC132                                                       | Π1 (pC132) plasmid in which the <i>attI</i> <sub>WT</sub> of pA873 has been changed for an <i>attI</i> <sub>AAA</sub>                                                                 | This work                               |
| ωC139                                                       | ω8488 attB:: <i>attI</i> <sub>AAA</sub> - <i>attI</i> <sub>STOP</sub> -dapA [Sp <sup>R</sup> ] (integration of plasmid pC132 in the chromosome). Direct orientation of the sites.     | This work                               |
| ωC140                                                       | ω8488 attB:: <i>attI</i> <sub>AAA</sub> - <i>attI</i> <sub>STOP</sub> -dapA [Sp <sup>R</sup> ] (integration of plasmid pC131 in the chromosome). Inverse orientation of the sites.    | This work                               |
| ωC162                                                       | ωC139 (p3938)                                                                                                                                                                         | This work                               |
| ωC163                                                       | ωC140 (p3938)                                                                                                                                                                         | This work                               |
| ωB413                                                       | ω8488 attB:: <i>attC</i> <sub>aadA7</sub> - <i>attC</i> <sub>ereA2</sub> -dapA [Sp <sup>R</sup> ] (integration of plasmid pB350 in the chromosome). Direct orientation of the sites.  | This work                               |
| ωB414                                                       | ω8488 attB:: <i>attC</i> <sub>aadA7</sub> - <i>attC</i> <sub>ereA2</sub> -dapA [Sp <sup>R</sup> ] (integration of plasmid pB340 in the chromosome). Inverse orientation of the sites. | This work                               |
| ωB476                                                       | ωB413 (p3938)                                                                                                                                                                         | This work                               |
| ωC478                                                       | ωB414 (p3938)                                                                                                                                                                         | This work                               |
| <b>Cleavage point determination through Deep Sequencing</b> |                                                                                                                                                                                       |                                         |
| ωC351                                                       | Π1 containing the library of <i>attI</i> <sub>N</sub> plasmids (pC351)                                                                                                                | This work                               |
| ωC373                                                       | β2163 containing pC351 library.                                                                                                                                                       | This work                               |
| ωC307                                                       | MG1655 <i>recA</i> (p3938)(pC252)                                                                                                                                                     | This work                               |
| <b>IntI1-MBP purification</b>                               |                                                                                                                                                                                       |                                         |
| ω9958                                                       | Top10 strain bearing pMAL-CX5:: <i>intI</i> <sub>Y312F</sub>                                                                                                                          | This work                               |
| ωB335                                                       | Top10 strain bearing pMAL-CX5:: <i>intI</i>                                                                                                                                           | This work                               |
| ω888                                                        | <i>E. coli</i> BL21 (DE3) strain containing the T7 polymerase and plasmid pLysS expressing T7 lysozyme                                                                                | Studier <i>et al.</i> 1990 <sup>3</sup> |
| <b>Left box recombination in the attC x attI reaction</b>   |                                                                                                                                                                                       |                                         |
| ωD060                                                       | β2163 donor of pSW23T:: <i>attC</i> <sub>aadA7</sub> bs                                                                                                                               | This work                               |
| ωD059                                                       | β2163 donor of pSW23T:: <i>attC</i> <sub>aadA7</sub> ts                                                                                                                               | This work                               |
| ωD805                                                       | β2163 donor of pSW23T:: Δ <i>T</i> <sub>23</sub> <i>attC</i> <sub>aadA7</sub> bs                                                                                                      | This work                               |
| ωD806                                                       | β2163 donor of pSW23T:: Δ <i>T</i> <sub>23</sub> <i>attC</i> <sub>aadA7</sub> ts                                                                                                      | This work                               |
| ω9669                                                       | Recipient DH5α bearing p3938 (pBAD:: <i>intI</i> ) and p929 (pSU38Δ:: <i>attI</i> )                                                                                                   | This work                               |

Supplementary Table 2. Plasmids used in this study

| Plasmid Number          | Relevant properties and construction                                              |
|-------------------------|-----------------------------------------------------------------------------------|
| <i>General plasmids</i> |                                                                                   |
| p929                    | pSU38Δ:: <i>attI</i> , <i>ori</i> <sub>p15A</sub> [Km <sup>R</sup> ] <sup>4</sup> |
| p3938                   | pBAD:: <i>intI</i> , <i>ori</i> ColE1 [Ap <sup>R</sup> ] <sup>5</sup>             |
| p4884                   | pSU38Δ:: <i>attI</i> , <i>ori</i> <sub>p15A</sub> [Sp <sup>R</sup> ] <sup>2</sup> |
| pSW23T                  | plasmid dependent on the pi protein for replication                               |
| pMAL-C5X                | plasmid for protein purification using a maltose binding protein tag (commercial) |

| <i>Mismatched covalent circles</i>                  |                                                                                                                                                                                                                                                              |
|-----------------------------------------------------|--------------------------------------------------------------------------------------------------------------------------------------------------------------------------------------------------------------------------------------------------------------|
| p8669                                               | pSW24:: <i>attI1</i> , <i>oriFdl1</i> , SacII <sup>+</sup> NarI <sup>+</sup> <i>oriV<sub>R6K</sub></i> , [Cm <sup>R</sup> ]. EcoRI/BamHI substitution of the <i>attC</i> site of p7770 <sup>2</sup> by an <i>attI1</i> site.                                 |
| p8670                                               | pSW24:: <i>attI1</i> , <i>oriFdl1</i> , SacII <sup>+</sup> NarI <sup>+</sup> <i>oriV<sub>R6K</sub></i> , [Cm <sup>R</sup> ]. EcoRI/BamHI substitution of the <i>attC</i> site of p7771 <sup>2</sup> by an <i>attI1</i> site.                                 |
| p1177                                               | pSB118:: <i>pir116</i> <sup>1</sup>                                                                                                                                                                                                                          |
| <i>Double cleavage. Chromosome.</i>                 |                                                                                                                                                                                                                                                              |
| pA642                                               | pMK-RQ:: :: <i>attI1<sub>WT</sub>-attI1<sub>STOP</sub>-ΔdapA</i> (dir), <i>ColE1</i> (Km <sup>R</sup> ). Plasmid from GeneArt.                                                                                                                               |
| pA749                                               | pMK-RQ:: :: <i>attI1<sub>WT</sub>-attI1<sub>STOP</sub>-ΔdapA</i> (inv), <i>ColE1</i> (Km <sup>R</sup> ). Inversion of the left <i>attI</i> site in pA642 by SmaI/XhoI digestion and religation.                                                              |
| pA873                                               | pSW23T:: <i>attI1<sub>WT</sub>-attI1<sub>STOP</sub>-dapA</i> (dir), <i>oriT<sub>RP4</sub></i> , <i>oriV<sub>R6K</sub></i> , <i>attP</i> [Sp <sup>R</sup> ]. Insertion (EcoRI/NruI) from pA642 into pSW23T. FRT (Flippase Recognition Target) added in EcoRI. |
| pA874                                               | pSW23T:: <i>attI1<sub>WT</sub>-attI1<sub>STOP</sub>-dapA</i> (inv), <i>oriT<sub>RP4</sub></i> , <i>oriV<sub>R6K</sub></i> , <i>attP</i> [Sp <sup>R</sup> ]. Insertion (EcoRI/NruI) from pA749 into pSW23T. FRT (Flippase Recognition Target) added in EcoRI. |
| pC131                                               | pSW23T:: <i>attI1<sub>AAA</sub>-attI1<sub>STOP</sub>-dapA</i> (dir), <i>oriT<sub>RP4</sub></i> , <i>oriV<sub>R6K</sub></i> , <i>attP</i> [Sp <sup>R</sup> ]. Modification of the left <i>attI</i> site from pA873 to avoid bottom-strand recombination.      |
| pC132                                               | pSW23T:: <i>attI1<sub>AAA</sub>-attI1<sub>STOP</sub>-dapA</i> (inv), <i>oriT<sub>RP4</sub></i> , <i>oriV<sub>R6K</sub></i> , <i>attP</i> [Sp <sup>R</sup> ]. Modification of the left <i>attI</i> site from pA874 to avoid bottom-strand recombination.      |
| pB350                                               | pSW23T:: <i>attC<sub>aadA7</sub>-attC<sub>ereA2</sub>-dapA</i> (dir), <i>oriT<sub>RP4</sub></i> , <i>oriV<sub>R6K</sub></i> , <i>attP</i> [Sp <sup>R</sup> ]. FRT (Flippase Recognition Target) added in EcoRI.                                              |
| pB340                                               | pSW23T:: <i>attC<sub>aadA7</sub>-attC<sub>ereA2</sub>-dapA</i> (inv), <i>oriT<sub>RP4</sub></i> , <i>oriV<sub>R6K</sub></i> , <i>attP</i> [Sp <sup>R</sup> ]. FRT (Flippase Recognition Target) added in EcoRI.                                              |
| <i>Cleavage site: Deep sequencing</i>               |                                                                                                                                                                                                                                                              |
| pC351                                               | pSW23T:: <i>attI1<sub>N</sub></i> Library of plasmids bearing random bases in <i>attI1</i> (XhoI/PstI).                                                                                                                                                      |
| pC252                                               | pSU38 bearing <i>attI<sub>TTT</sub></i> .                                                                                                                                                                                                                    |
| <i>attC x attI recombination through the L box.</i> |                                                                                                                                                                                                                                                              |
| pD060                                               | pSW23T:: <i>attC<sub>aadA7</sub></i> bs                                                                                                                                                                                                                      |
| pD059                                               | pSW23T:: <i>attC<sub>aadA7</sub></i> ts                                                                                                                                                                                                                      |
| pD805                                               | pSW23T:: $\Delta T_{23}$ <i>attC<sub>aadA7</sub></i> bs                                                                                                                                                                                                      |
| pD806                                               | pSW23T:: $\Delta T_{23}$ <i>attC<sub>aadA7</sub></i> ts                                                                                                                                                                                                      |

Supplementary Table 3. Oligonucleotides used in this study

| Number                             | Name     | Sequence                      | Purpose                                                                  |
|------------------------------------|----------|-------------------------------|--------------------------------------------------------------------------|
| <i>Host machinery</i>              |          |                               |                                                                          |
| 1897                               | Swbeg    | CCGTCACAGGTATTTATTCGGCG       | Testing for recombination                                                |
| 2420                               | MFD      | CGCCAGGGTTTTCCAGTCAC          |                                                                          |
| <i>Mismatched Covalent Circles</i> |          |                               |                                                                          |
| 2391                               | SeqattI1 | CACAGGAAACAGCTATGACC          | Amplification of the region of the cointegrate including the mismatches. |
| 2393                               | SeqNar   | GCTTAATGAATTACAACAGTACTG<br>C |                                                                          |
| <i>Double cleavage</i>             |          |                               |                                                                          |
| 1078                               | MV143    | CCTCTTACGTGCCGATCAACGTCTC     | Verification of the constructs in pSW plasmids                           |
| 1962                               | DapA-R   | GTGGTGCCAACAGAAACGATCGC       |                                                                          |



|                                              |                          |                                                               |                                                                                                      |
|----------------------------------------------|--------------------------|---------------------------------------------------------------|------------------------------------------------------------------------------------------------------|
| 571                                          | lacI-F                   | CATTAATGCAGCTGGCACGA                                          | Sequencing                                                                                           |
| 2263                                         | 5- Eco-FRT-Eco           | AATTCGAAGTTCCTATTCCGAAGTTCCTATTCTCTAGAAAGTATAGGAACTTCG        | Insertion of a FRT site in pSW plasmids                                                              |
| 2264                                         | 3- Eco-FRT-Eco           | AATTCGAAGTTCCTATACTTTCTAGAGAATAGGAACTTCGGAATAGGAACTTCG        |                                                                                                      |
| 1897                                         | Swbeg                    | CCGTCACAGGTATTTATTCGGCG                                       | Verification of the monomeric/dimeric insertion of pSW plasmids in the chromosome                    |
| 1898                                         | Swend                    | CCTCACTAAAGGGAACAAAAGCTG                                      |                                                                                                      |
| 1319                                         | insertion lac-a          | TTCAACTAGTGCCTGTGGAATGTGACGATCTTCGCGTCACC                     |                                                                                                      |
| 1698                                         | inv1_attL6               | AATAATGATTTTATTTGACTGATGTGACCTGTTCGTTGC                       |                                                                                                      |
| 1897                                         | Swbeg                    | CCGTCACAGGTATTTATTCGGCG                                       | Verification of the inversion of the region between inverted <i>attI</i> sites (double cleavage)     |
| 2933                                         | Directionel Rec DAP      | CATACTCGTATGTTGTGTGG                                          |                                                                                                      |
| 930                                          | J23100-R                 | CACTGTACCTAGGACTGAGCTAGCC                                     |                                                                                                      |
| 1897                                         | Swbeg                    | CCGTCACAGGTATTTATTCGGCG                                       | Verification of recombination between direct <i>attI</i> sites                                       |
| 1962                                         | DapA-R                   | GTGGTGCCAACAGAAACGATCGC                                       |                                                                                                      |
| <b><i>Cleavage site: deep sequencing</i></b> |                          |                                                               |                                                                                                      |
| 2915                                         | mutatti WT F             | GCGCCTCGAGGTTCGGTTAATGTATGGAGCAGCAACGATGTTACGCAGCAGGGCAGTCG   | Amplification of <i>attI</i> sites with random bases to build the library of <i>attI<sub>N</sub></i> |
| 2916                                         | mutatti WT R A1          | GCGCCTGCAGTCCCCTGGCGTAACTTTGNTTTAGGGCGACTGCCCTGCTGCGTAACATCG  |                                                                                                      |
| 2917                                         | mutatti WT R A2          | GCGCCTGCAGTCCCCTGGCGTAACTTTGTNTTAGGGCGACTGCCCTGCTGCGTAACATCG  |                                                                                                      |
| 2918                                         | mutatti WT R A3          | GCGCCTGCAGTCCCCTGGCGTAACTTTGTTNTAGGGCGACTGCCCTGCTGCGTAACATCG  |                                                                                                      |
| 2919                                         | mutatti WT R A4          | GCGCCTGCAGTCCCCTGGCGTAACTTTGTTTTNAGGGCGACTGCCCTGCTGCGTAACATCG |                                                                                                      |
| 2920                                         | mutatti WT R C1          | GCGCCTGCAGTCCCCTGGCGTAACTTTNTTTTAGGGCGACTGCCCTGCTGCGTAACATCG  |                                                                                                      |
| 2921                                         | mutatti WT R C2          | GCGCCTGCAGTCCCCTGGCGTAACTTTGTTTTANGGCGACTGCCCTGCTGCGTAACATCG  |                                                                                                      |
| 2922                                         | mutatti WT R C3          | GCGCCTGCAGTCCCCTGGCGTAACTTTGTTTTAGNGCGACTGCCCTGCTGCGTAACATCG  |                                                                                                      |
| 2923                                         | mutatti WT R C4          | GCGCCTGCAGTCCCCTGGCGTAACTTTGTTTTAGNCGACTGCCCTGCTGCGTAACATCG   |                                                                                                      |
| 2924                                         | mutatti WT R Control (G) | GCGCCTGCAGTCCCCTGGCGTAACTTTGTTTTAGGGCGACTGCCCTGCTGCGTAACATCG  |                                                                                                      |
| 2925                                         | mutatti WT T             | GCGCCTGCAGTCCCCTGGCGTAACTTTGTTTTNNGGCGACTGCCCTGCTGCGTAACATCG  |                                                                                                      |
| 3449                                         | attIN's right            | TTTGATTTGAGCTCCACCGC                                          | Amplification of the <i>attI</i> sites from the library and the                                      |
| 1236                                         | MV202                    | TCAACGGGAATCCTGCTCTG                                          |                                                                                                      |

|                                                                     |                                                       |                                                                              |                                                                               |
|---------------------------------------------------------------------|-------------------------------------------------------|------------------------------------------------------------------------------|-------------------------------------------------------------------------------|
| 738                                                                 | MV84                                                  | CGACCATATGAAGAGGATGCCGCT<br>AGGACC                                           | cointegrates.                                                                 |
| 1896                                                                | MRV                                                   | AGCGGATAACAATTTACACAGGA                                                      |                                                                               |
| <b>In vitro</b>                                                     |                                                       |                                                                              |                                                                               |
| 3885                                                                | attI WT top                                           | TTTGATGTTATGGAGCAGCAACGA<br>TGTTACGCAGCAGGGCAGTCGCCC<br>TAAACAAAGTTAGGCATCA  | Construction of <i>attI</i><br>substrates for <i>in vitro</i><br>experiments. |
| 3886                                                                | attI WT bot                                           | TGATGCCTAACTTTGTTTTAGGGCG<br>ACTGCCCTGCTGCGTAACATCGTTG<br>CTGCTCCATAACATCAAA |                                                                               |
| 3887                                                                | attI TTT top                                          | TTTGATGTTATGGAGCAGCAACGA<br>TGTTACGCAGCAGGGCAGTCGCCC<br>TAAACAAATTTAGGCATCA  |                                                                               |
| 3888                                                                | attI TTT bot                                          | TGATGCCTAAATTTGTTTTAGGGCG<br>ACTGCCCTGCTGCGTAACATCGTTG<br>CTGCTCCATAACATCAAA |                                                                               |
| 3889                                                                | attI<br>L:AAATC<br>R:WT top                           | TTTGATGTTATGGAGCAGCAACGA<br>TGTTACGCAGCAGGGCAGTCGCCC<br>TAAATCAAAGTTAGGCATCA |                                                                               |
| <b>Influence of <math>T_{23}</math> in the attC x attI reaction</b> |                                                       |                                                                              |                                                                               |
| 3849                                                                | <i>attC</i> <sub>aadA7</sub> -Fw                      | AATTCGTCTAACAATTCATTCAAGC<br>CGACGCCGCTTCGCGGCGCGGCTT<br>AATTCAGCGTTAGACG    | Construction of the wild type<br><i>aadA7</i> site                            |
| 3850                                                                | <i>attC</i> <sub>aadA7</sub> -Rev                     | GATCCGTCTAACGCTTGAATTAAGC<br>CGCGCCGCGAAGCGGCGTCGGCTT<br>GAATGAATTGTTAGACG   |                                                                               |
| 3571                                                                | <i>attC</i> <sub>aadA7</sub> - $\Delta T_{23}$<br>Fw  | GATCCGTCTAACGCTTGAATTAAGC<br>CGCGCCGCGAAGCGGCGCGGCTTG<br>AATGAATTGTTAGACG    | Construction of the $\Delta T_{23}$<br><i>aadA7</i> site                      |
| 3572                                                                | <i>attC</i> <sub>aadA7</sub> - $\Delta T_{23}$<br>Rev | AATTCGTCTAACAATTCATTCAAGC<br>CGCGCCGCTTCGCGGCGCGGCTTA<br>ATTCAAGCGTTAGACG    |                                                                               |
| 1897                                                                | Swbeg                                                 | CCGTCACAGGTATTTATTCGGCG                                                      | Determination of the<br>orientation and<br>recombination box.                 |
| 1898                                                                | Swend                                                 | CCTCACTAAAGGGAACAAAAGCTG                                                     |                                                                               |
| 1895                                                                | MFD                                                   | CGCCAGGGTTTTCCAGTCAC                                                         |                                                                               |
| 571                                                                 | lacI-F                                                | CATTAATGCAGCTGGCACGA                                                         |                                                                               |
| 3883                                                                | RpLp                                                  | GGATCCGTCTAACGCTTG                                                           |                                                                               |
| 3884                                                                | RppLpp                                                | GAATTCGTCTAACAATTC                                                           |                                                                               |

## Supplementary references

1. Demarre, G. et al. A new family of mobilizable suicide plasmids based on the broad host range R388 plasmid (IncW) or RP4 plasmid (IncPa) conjugative machineries and their cognate *E.coli* host strains. *Research in Microbiology* **156**, 245-55 (2005).
2. Loot, C., Ducos-Galand, M., Escudero, J.A., Bouvier, M. & Mazel, D. Replicative resolution of integron cassette insertion. *Nucleic Acids Res* **40**, 8361-70 (2012).
3. Studier, F.W., Rosenberg, A.H., Dunn, J.J. & Dubendorff, J.W. Use of T7 RNA polymerase to direct expression of cloned genes. *Methods Enzymol* **185**, 60-89 (1990).

4. Biskri, L., Bouvier, M., Guerout, A.M., Boissnard, S. & Mazel, D. Comparative Study of Class 1 Integron and *Vibrio cholerae* Superintegron Integrase Activities. *J Bacteriol* **187**, 1740-50 (2005).
5. Demarre, G., Frumerie, C., Gopaul, D.N. & Mazel, D. Identification of key structural determinants of the IntI1 integron integrase that influence *attC* x *attI1* recombination efficiency. *Nucleic Acids Res* **35**, 6475-89 (2007).
